# Supplementary material for: Maternal Iodine Status is Associated with Offspring Language Skills in Infancy and Toddlerhood
Source: MDPI journal article supplement (doi:10.3390/nu10091270), 2018-09-09
Supplement: s1 [file s1]

**Table S1.** Longitudinal regressions of maternal use of iodine-containing supplement and the overall mean of standardized scores on child neurodevelopment. Non-users of iodine-containing supplements serve as reference group. Complete case analysis.

| Bayley III1         | n   | Iodine supplement |             |       |                              |             |       |                              |             |       |
|---------------------|-----|-------------------|-------------|-------|------------------------------|-------------|-------|------------------------------|-------------|-------|
|                     |     | Crude models      |             |       | Adjusted models <sup>2</sup> |             |       | Adjusted models <sup>2</sup> |             |       |
|                     |     |                   |             |       |                              |             |       | Complete cases*              |             |       |
|                     |     | B3                | 95% CI      | p     | B3                           | 95% CI      | p     | B3                           | 95% CI      | p     |
| Cognitive score     | 813 | 0.00              | -0.13,0.13  | 0.98  | 0.02                         | -0.11,0.15  | 0.79  | 0.08                         | -0.05,0.22  | 0.24  |
| Receptive language  | 813 | 0.02              | -0.10,0.14  | 0.79  | -0.02                        | -0.14,0.11  | 0.81  | 0.03                         | -0.10,0.16  | 0.67  |
| Expressive language | 813 | 0.07              | -0.05,0.20  | 0.26  | 0.05                         | -0.08,0.18  | 0.44  | 0.10                         | -0.03,0.23  | 0.14  |
| Fine motor skills   | 810 | -0.12             | -0.25,0.02  | 0.093 | -0.10                        | -0.23,0.03  | 0.15  | -0.06                        | -0.20,0.08  | 0.42  |
| Gross motor skills  | 810 | -0.20             | -0.35,-0.05 | 0.010 | -0.18                        | -0.33,-0.03 | 0.020 | -0.17                        | -0.33,-0.01 | 0.033 |

<sup>1</sup>Bayley Scales of Infant and Toddler Development, third edition.

<sup>2</sup>Models were adjusted for maternal age, prepregnancy BMI, marital status, education, parity, daily smoking in pregnancy, use of supplements containing omega-3 fatty acid in pregnancy, and child sex.

<sup>3</sup>Standardized beta coefficient

\* Models include only participants with no missing covariates (n=696 (694 for motor outcomes)).
