# Supplementary figures and images for: Maternal Iodine Status is Associated with Offspring Language Skills in Infancy and Toddlerhood
Source: MDPI journal article supplement (doi:10.3390/nu10091270), 2018-09-09

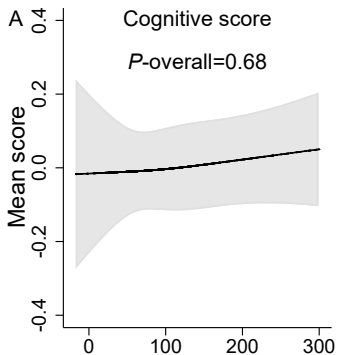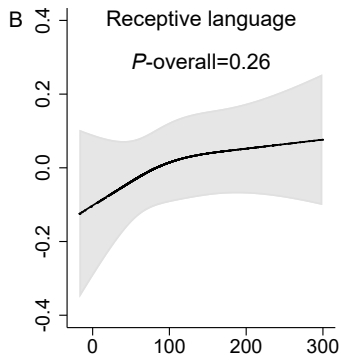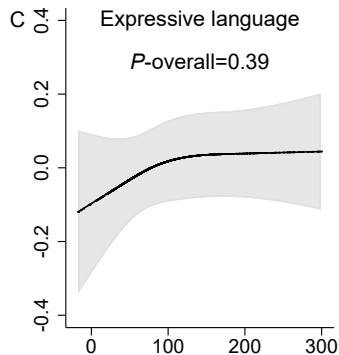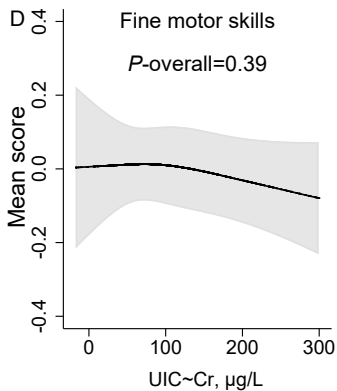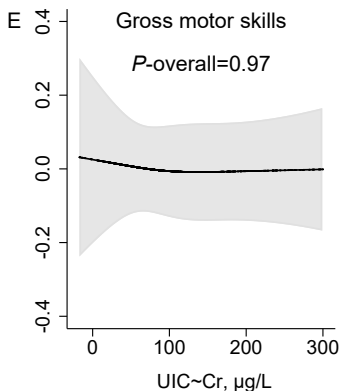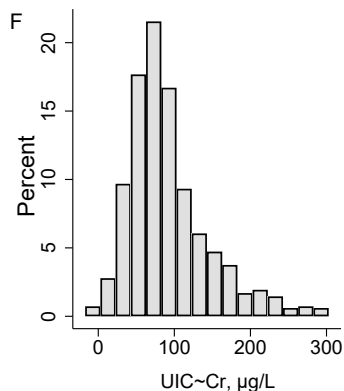

Supplement: s1 [file s1]

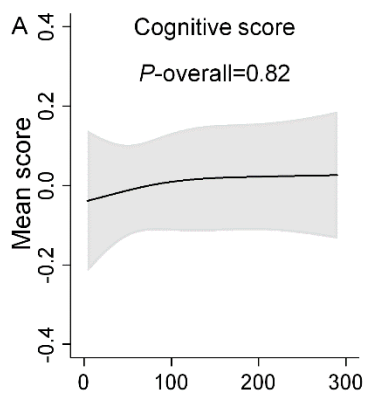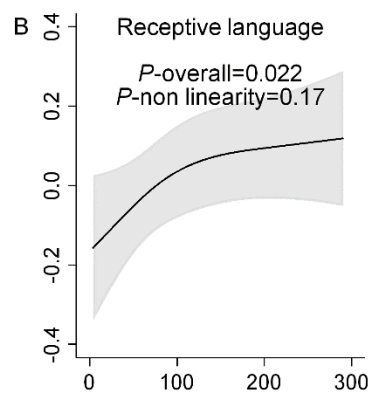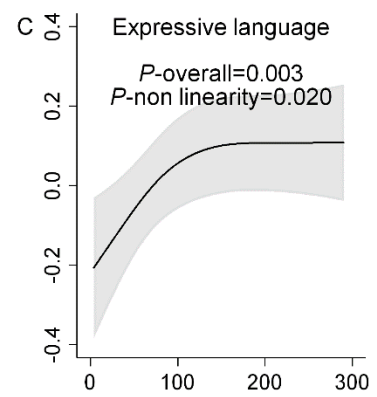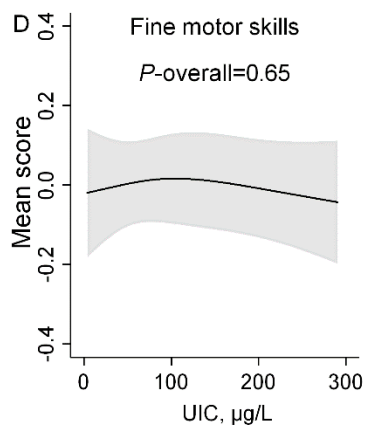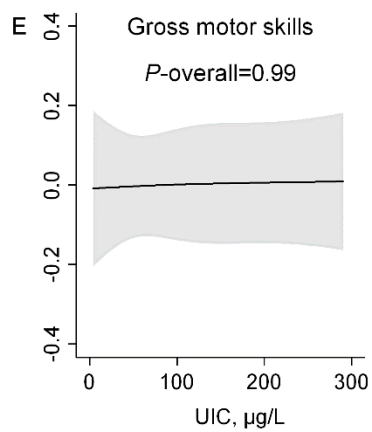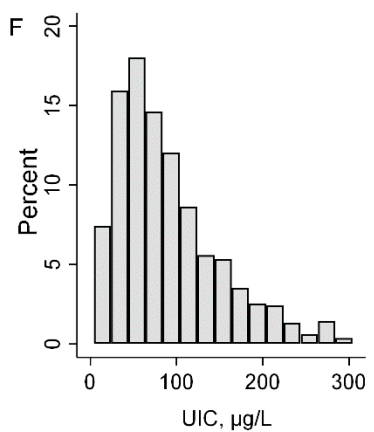

Supplement: s1 [file s1]

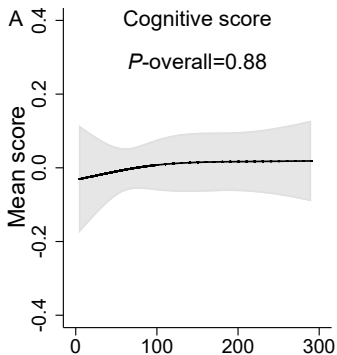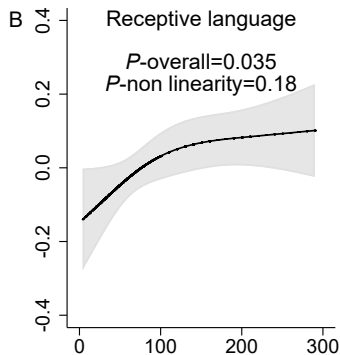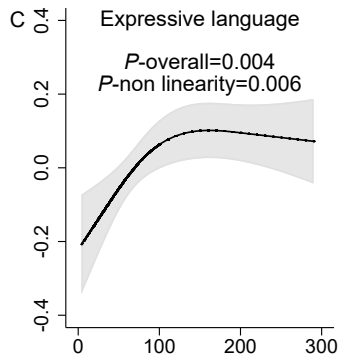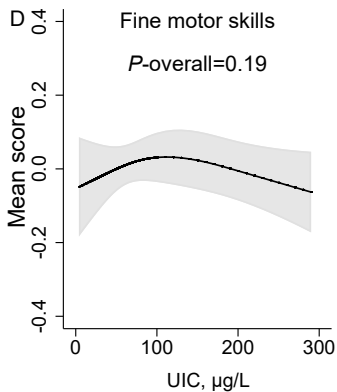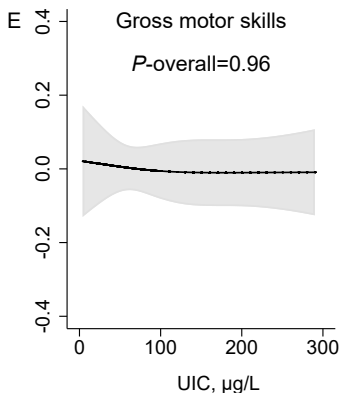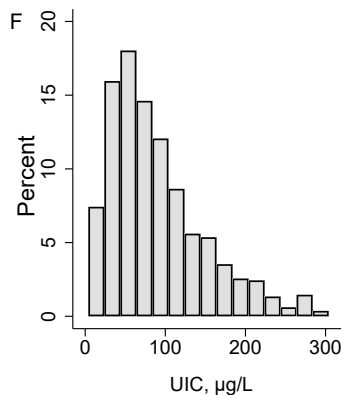

Supplement: s1 [file s1]

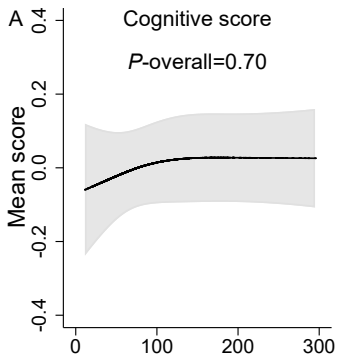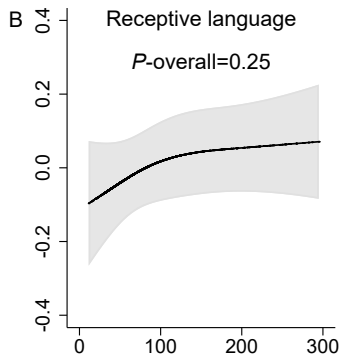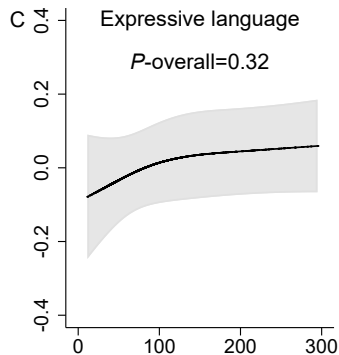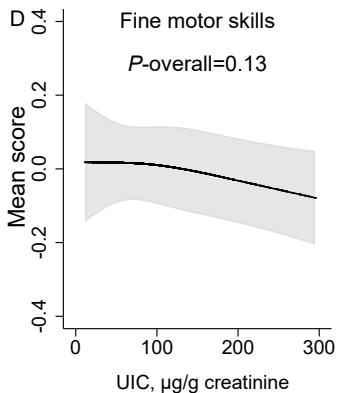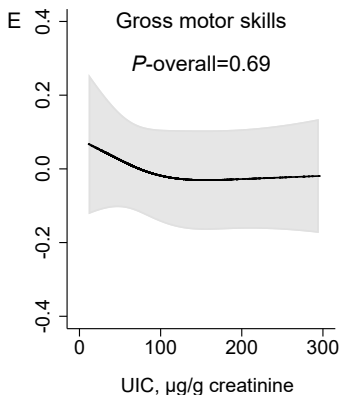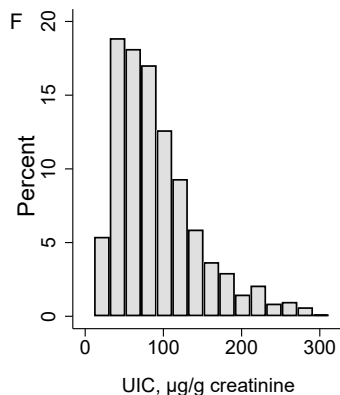

Supplement: s1 [file s1]
